# Supplementary material for: Integrated Scheduling of Production and Two-Stage Delivery of Make-to-Order Products: Offline and Online Algorithms
Source: Atypon-hosted journal article supplement (doi:10.1287/ijoc.2018.0842), 2019-05-03
Supplement: ijoc.2018.0842.sm1.pdf [file ijoc.2018.0842.sm1.pdf]

**Online Supplement of the Paper “Integrated Scheduling of Production and Two-Stage Delivery of Make-to-Order Products: Offline and Online Algorithms” Lixin Tang, Feng Li and Zhi-Long Chen**

**Real production data used in the computational experiments**

| instance | $(n, m, k)$ | $c_0$ | $t_0$ | $f_0$ | $n_i$ | $c_i$ | $t_i$ | $f_i$  | $P_{ij}$                                                                                                                                       |
|----------|-------------|-------|-------|-------|-------|-------|-------|--------|------------------------------------------------------------------------------------------------------------------------------------------------|
| 1        | (30,1,1)    | 3     | 47    | 75    | 30    | 30    | 155   | 18750  | 23, 27, 23, 24, 15, 19, 20, 22, 19, 18, 32, 33, 26, 24, 27, 17, 15, 19, 23, 16, 26, 23, 22, 33, 18, 22, 23, 33, 34, 16                         |
| 2        | (30,1,1)    | 3     | 47    | 75    | 30    | 30    | 157   | 19500  | 21, 30, 31, 31, 21, 18, 18, 24, 20, 15, 22, 32, 31, 31, 26, 23, 26, 21, 25, 32, 24, 27, 27, 19, 35, 35, 30, 16, 24, 17                         |
| 3        | (30,1,1)    | 3     | 47    | 75    | 30    | 70    | 406   | 117250 | 19, 20, 31, 25, 19, 16, 16, 34, 21, 33, 33, 17, 23, 25, 34, 21, 15, 23, 27, 19, 29, 32, 32, 27, 31, 27, 16, 20, 35, 19                         |
| 4        | (30,1,1)    | 3     | 47    | 75    | 30    | 30    | 138   | 17250  | 17, 23, 18, 32, 25, 15, 34, 15, 22, 22, 22, 16, 15, 32, 33, 27, 26, 17, 17, 27, 26, 15, 25, 21, 27, 19, 30, 23, 25, 34                         |
| 5        | (30,1,1)    | 3     | 47    | 75    | 30    | 30    | 140   | 17250  | 15, 25, 18, 18, 23, 35, 24, 25, 15, 19, 33, 23, 28, 26, 20, 24, 16, 19, 19, 22, 31, 19, 30, 29, 23, 32, 16, 27, 23, 35                         |
| 6        | (30,1,1)    | 3     | 47    | 75    | 30    | 70    | 409   | 119000 | 34, 15, 27, 26, 29, 33, 22, 15, 16, 16, 23, 22, 19, 20, 19, 30, 26, 21, 22, 30, 29, 23, 35, 24, 27, 24, 23, 31, 34, 29                         |
| 7        | (30,1,1)    | 3     | 47    | 75    | 30    | 30    | 121   | 15000  | 32, 18, 27, 33, 27, 32, 20, 17, 17, 34, 33, 28, 32, 27, 26, 28, 16, 23, 32, 18, 26, 27, 28, 31, 23, 16, 29, 34, 23, 31                         |
| 8        | (30,1,1)    | 3     | 47    | 75    | 30    | 70    | 598   | 173250 | 29, 21, 35, 27, 33, 30, 17, 27, 18, 23, 23, 27, 24, 21, 26, 34, 18, 17, 34, 26, 31, 31, 33, 18, 19, 29, 15, 17, 34, 24                         |
| 9        | (30,1,1)    | 3     | 47    | 75    | 30    | 70    | 412   | 119000 | 27, 31, 22, 34, 31, 29, 15, 29, 19, 20, 34, 34, 16, 35, 25, 32, 29, 19, 24, 21, 28, 35, 25, 33, 15, 22, 22, 21, 32, 26                         |
| 10       | (30,1,1)    | 3     | 47    | 75    | 30    | 30    | 104   | 12750  | 25, 34, 22, 20, 17, 27, 34, 18, 20, 17, 23, 32, 29, 21, 32, 17, 18, 21, 26, 29, 34, 18, 31, 20, 33, 35, 29, 16, 22, 27                         |
| 11       | (36,1,1)    | 3     | 47    | 75    | 36    | 70    | 366   | 106750 | 32, 29, 21, 28, 34, 18, 21, 15, 32, 15, 29, 15, 29, 16, 31, 22, 15, 35, 29, 27, 35, 20, 33, 21, 24, 30, 32, 35, 16, 20, 20, 25, 26, 15, 15, 16 |
| 12       | (36,1,1)    | 3     | 47    | 75    | 36    | 30    | 169   | 21000  | 29, 31, 35, 25, 24, 17, 33, 22, 18, 21, 18, 17, 18, 32, 15, 26, 28, 22, 25, 19, 21, 24, 23, 23, 32, 17, 19, 19, 17, 21, 32, 19, 34, 20, 21, 15 |
| 13       | (36,1,1)    | 3     | 47    | 75    | 36    | 70    | 537   | 155750 | 27, 20, 15, 22, 34, 23, 17, 16, 17, 18, 29, 18, 20, 19, 34, 30, 33, 29, 21, 32, 15, 27, 34, 16, 27, 25, 35, 24, 31, 30, 31, 26, 29, 17, 35, 23 |
| 14       | (36,1,1)    | 3     | 47    | 75    | 36    | 30    | 77    | 9000   | 25, 22, 16, 19, 24, 22, 30, 31, 17, 24, 18, 20, 23, 27, 18, 34, 18, 24, 25, 24, 21, 31, 32, 18, 15, 19, 22, 28, 32, 31, 22, 20, 17, 35, 20, 31 |
| 15       | (36,1,1)    | 3     | 47    | 75    | 36    | 30    | 175   | 21750  | 23, 33, 17, 29, 35, 29, 22, 17, 24, 22, 29, 35, 33, 22, 15, 17, 31, 31, 21, 16, 28, 35, 22, 33, 23, 27, 30, 33, 33, 32, 22, 28, 33, 32, 34, 30 |
| 16       | (36,1,1)    | 3     | 47    | 75    | 36    | 70    | 548   | 159250 | 20, 35, 18, 26, 24, 27, 35, 32, 24, 28, 19, 16, 35, 30, 20, 21, 15, 26, 17, 29, 35, 17, 32, 34, 18, 35, 17, 17, 26, 20, 34, 22, 28, 29, 27, 17 |
| 17       | (36,1,1)    | 3     | 47    | 75    | 36    | 30    | 83    | 9750   | 18, 24, 19, 23, 35, 34, 26, 18, 31, 26, 29, 18, 25, 17, 18,                                                                                    |

|    |          |   |    |    |        |        |          |               |                                                                                                                                                                                                |
|----|----------|---|----|----|--------|--------|----------|---------------|------------------------------------------------------------------------------------------------------------------------------------------------------------------------------------------------|
|    |          |   |    |    |        |        |          |               | 33, 29, 34, 34, 21, 20, 21, 22, 15, 26, 30, 25, 22, 27, 22, 33, 29, 15, 26, 32, 24                                                                                                             |
| 18 | (36,1,1) | 3 | 47 | 75 | 36     | 30     | 60       | 7500          | 16, 34, 20, 20, 25, 33, 18, 32, 30, 32, 19, 33, 27, 33, 15, 17, 34, 28, 30, 26, 27, 25, 20, 30, 34, 16, 33, 26, 29, 23, 24, 23, 31, 23, 25, 24                                                 |
| 19 | (36,1,1) | 3 | 47 | 75 | 36     | 30     | 135      | 16500         | 35, 15, 34, 30, 35, 31, 31, 26, 17, 30, 21, 35, 30, 20, 20, 21, 18, 15, 26, 18, 34, 28, 31, 31, 29, 32, 20, 31, 22, 32, 24, 17, 18, 20, 31, 32                                                 |
| 20 | (36,1,1) | 3 | 47 | 75 | 36     | 70     | 399      | 115500        | 32, 26, 35, 27, 25, 17, 23, 33, 16, 35, 32, 16, 19, 28, 17, 25, 32, 22, 22, 31, 19, 32, 21, 25, 16, 19, 15, 15, 23, 33, 15, 24, 35, 16, 24, 18                                                 |
| 21 | (42,1,2) | 3 | 47 | 75 | 19, 23 | 70, 70 | 187, 426 | 54250, 124250 | 15, 27, 15, 33, 21, 18, 21, 23, 23, 29, 16, 17, 26, 23, 26, 15, 32, 27, 24, 27, 23, 20, 24, 34, 35, 18, 30, 34, 17, 18, 22, 23, 18, 17, 20, 17, 31, 32, 20, 35, 32, 30                         |
| 22 | (42,1,2) | 3 | 47 | 75 | 22, 20 | 70, 30 | 249, 90  | 71750, 11250  | 28, 21, 23, 18, 32, 33, 24, 31, 20, 33, 21, 24, 22, 15, 20, 18, 30, 20, 32, 21, 31, 24, 17, 22, 26, 25, 17, 31, 23, 25, 15, 32, 15, 34, 28, 26, 34, 32, 15, 35, 33, 29                         |
| 23 | (42,1,2) | 3 | 47 | 75 | 21, 21 | 70, 30 | 311, 122 | 89250, 15000  | 32, 28, 22, 16, 21, 35, 34, 18, 25, 16, 35, 19, 18, 28, 26, 35, 20, 22, 27, 29, 18, 29, 18, 23, 18, 19, 33, 28, 15, 33, 21, 33, 33, 30, 23, 34, 29, 24, 31, 35, 34, 28                         |
| 24 | (42,1,2) | 3 | 47 | 75 | 21, 21 | 70, 70 | 304, 234 | 87500, 68250  | 24, 22, 29, 22, 32, 16, 16, 26, 22, 20, 19, 26, 35, 20, 33, 18, 31, 16, 35, 16, 26, 34, 32, 24, 17, 35, 20, 25, 21, 33, 35, 33, 21, 26, 32, 22, 24, 24, 26, 27, 27, 27                         |
| 25 | (42,1,2) | 3 | 47 | 75 | 20, 22 | 70, 30 | 366, 63  | 106750, 7500  | 16, 29, 29, 20, 21, 31, 18, 21, 28, 24, 32, 34, 31, 33, 19, 21, 21, 17, 22, 31, 34, 17, 33, 33, 29, 21, 15, 22, 35, 19, 28, 21, 18, 22, 27, 31, 19, 17, 21, 27, 28, 25                         |
| 26 | (42,1,2) | 3 | 47 | 75 | 19, 23 | 30, 30 | 103, 118 | 12750, 14250  | 29, 23, 15, 26, 32, 33, 28, 29, 25, 28, 16, 28, 27, 25, 25, 25, 31, 19, 17, 18, 21, 22, 34, 34, 28, 15, 24, 19, 20, 27, 34, 22, 15, 18, 22, 18, 15, 30, 16, 27, 21, 32                         |
| 27 | (42,1,2) | 3 | 47 | 75 | 26, 16 | 30, 70 | 130, 533 | 15750, 154000 | 21, 16, 15, 24, 21, 35, 31, 16, 30, 32, 22, 15, 23, 17, 32, 29, 29, 34, 25, 26, 16, 27, 27, 35, 20, 22, 19, 16, 34, 26, 27, 22, 33, 22, 30, 27, 31, 30, 32, 27, 22, 31                         |
| 28 | (42,1,2) | 3 | 47 | 75 | 24, 18 | 30, 30 | 133, 60  | 16500, 7500   | 33, 23, 35, 21, 32, 16, 20, 32, 27, 15, 35, 30, 19, 30, 18, 32, 19, 35, 34, 21, 23, 32, 28, 23, 19, 16, 35, 21, 27, 34, 20, 31, 22, 18, 25, 28, 26, 22, 19, 20, 23, 29                         |
| 29 | (42,1,2) | 3 | 47 | 75 | 19, 23 | 30, 70 | 160, 265 | 19500, 77000  | 25, 17, 21, 27, 22, 31, 23, 20, 25, 19, 19, 17, 23, 22, 24, 15, 30, 29, 21, 28, 31, 15, 29, 24, 31, 23, 22, 18, 32, 20, 26, 32, 18, 35, 20, 15, 29, 22, 35, 20, 16, 28                         |
| 30 | (42,1,2) | 3 | 47 | 75 | 26, 16 | 30, 70 | 163, 411 | 20250, 119000 | 17, 32, 21, 25, 24, 33, 25, 28, 30, 23, 25, 25, 19, 35, 31, 19, 20, 30, 16, 15, 18, 20, 22, 25, 30, 17, 17, 15, 25, 20, 19, 33, 15, 31, 28, 24, 24, 35, 30, 20, 17, 27                         |
| 31 | (48,1,2) | 3 | 47 | 75 | 21, 27 | 30, 70 | 113, 201 | 13500, 57750  | 35, 23, 27, 27, 17, 19, 15, 27, 25, 22, 18, 24, 24, 31, 26, 25, 23, 34, 21, 32, 25, 33, 31, 28, 33, 33, 25, 27, 23, 33, 19, 35, 25, 33, 19, 26, 27, 15, 35, 25, 34, 22, 17, 22, 26, 17, 28, 19 |

|    |          |   |    |    |           |           |             |                  |                                                                                                                                                                                                                                                        |
|----|----------|---|----|----|-----------|-----------|-------------|------------------|--------------------------------------------------------------------------------------------------------------------------------------------------------------------------------------------------------------------------------------------------------|
| 32 | (48,1,2) | 3 | 47 | 75 | 30,<br>18 | 30,<br>70 | 142,<br>270 | 17250,<br>78750  | 17, 31, 32, 32, 22, 27, 32, 19, 31, 26, 29, 26, 32, 18, 34, 30, 24, 35, 21, 19, 21, 30, 24, 35, 18, 21, 22, 23, 31, 20, 15, 27, 20, 33, 33, 24, 35, 25, 35, 18, 21, 35, 19, 22, 23, 18, 23, 15                                                         |
| 33 | (48,1,2) | 3 | 47 | 75 | 28,<br>20 | 30,<br>30 | 148,<br>121 | 18000,<br>15000  | 19, 18, 30, 15, 15, 21, 28, 32, 17, 30, 19, 27, 27, 25, 21, 34, 17, 15, 33, 34, 16, 27, 17, 35, 32, 22, 19, 19, 26, 29, 31, 27, 15, 33, 34, 23, 29, 15, 34, 25, 22, 19, 20, 21, 32, 19, 31, 24                                                         |
| 34 | (48,1,2) | 3 | 47 | 75 | 29,<br>19 | 30,<br>30 | 178,<br>100 | 21750,<br>12000  | 29, 34, 35, 19, 20, 29, 24, 24, 24, 33, 30, 21, 35, 20, 16, 18, 18, 24, 32, 20, 24, 24, 23, 21, 25, 22, 15, 15, 22, 17, 26, 19, 31, 33, 27, 22, 15, 17, 34, 19, 31, 31, 30, 34, 29, 19, 26, 20                                                         |
| 35 | (48,1,2) | 3 | 47 | 75 | 25,<br>23 | 30,<br>30 | 63,<br>176  | 7500,<br>21750   | 32, 21, 32, 23, 25, 23, 20, 16, 31, 16, 27, 23, 22, 28, 24, 23, 19, 25, 23, 35, 19, 21, 15, 29, 31, 31, 25, 32, 30, 25, 21, 32, 26, 25, 28, 28, 31, 27, 33, 34, 18, 15, 31, 34, 25, 20, 22, 16                                                         |
| 36 | (48,1,2) | 3 | 47 | 75 | 27,<br>21 | 30,<br>30 | 92,<br>154  | 11250,<br>18750  | 21, 29, 16, 35, 17, 31, 24, 29, 16, 33, 17, 16, 17, 35, 32, 28, 33, 26, 23, 21, 27, 17, 21, 29, 24, 32, 22, 28, 25, 34, 24, 32, 21, 26, 29, 27, 17, 17, 32, 19, 19, 28, 33, 34, 22, 20, 30, 33                                                         |
| 37 | (48,1,2) | 3 | 47 | 75 | 28,<br>20 | 30,<br>70 | 99,<br>546  | 12000,<br>159250 | 24, 16, 35, 18, 23, 17, 20, 21, 23, 15, 28, 18, 25, 30, 19, 32, 34, 15, 35, 15, 23, 35, 35, 15, 17, 32, 19, 24, 20, 35, 19, 25, 16, 26, 22, 26, 32, 27, 32, 34, 28, 33, 34, 26, 31, 21, 25, 29                                                         |
| 38 | (48,1,2) | 3 | 47 | 75 | 24,<br>24 | 30,<br>30 | 105,<br>111 | 12750,<br>13500  | 26, 32, 32, 22, 28, 33, 16, 34, 30, 19, 18, 33, 33, 17, 27, 16, 15, 16, 26, 30, 31, 32, 28, 23, 23, 20, 28, 20, 28, 22, 15, 25, 32, 18, 23, 25, 19, 30, 31, 28, 15, 25, 15, 26, 28, 22, 33, 17                                                         |
| 39 | (48,1,2) | 3 | 47 | 75 | 17,<br>31 | 30,<br>30 | 134,<br>89  | 16500,<br>10500  | 15, 19, 16, 26, 20, 19, 33, 26, 15, 23, 29, 34, 20, 25, 35, 21, 29, 17, 25, 16, 26, 29, 34, 22, 16, 21, 25, 16, 23, 31, 31, 17, 19, 18, 24, 23, 26, 19, 31, 34, 16, 29, 16, 26, 24, 22, 28, 34                                                         |
| 40 | (48,1,2) | 3 | 47 | 75 | 29,<br>19 | 70,<br>30 | 441,<br>67  | 127750<br>, 8250 | 18, 27, 34, 30, 26, 35, 29, 18, 30, 26, 27, 28, 15, 19, 22, 26, 30, 26, 17, 31, 21, 26, 27, 30, 30, 22, 22, 33, 31, 19, 26, 17, 35, 18, 17, 22, 20, 29, 30, 28, 24, 21, 18, 17, 20, 23, 23, 30                                                         |
| 41 | (62,2,1) | 3 | 47 | 75 | 62        | 70        | 211         | 61250            | 17, 30, 31, 27, 16, 18, 29, 23, 32, 17, 15, 22, 19, 29, 26, 27, 21, 30, 30, 18, 18, 21, 28, 19, 30, 22, 33, 26, 19, 17, 30, 24, 32, 26, 21, 33, 15, 18, 22, 30, 27, 25, 18, 26, 28, 26, 16, 23, 32, 34, 20, 26, 20, 20, 32, 33, 26, 25, 24, 29, 17, 33 |
| 42 | (62,2,1) | 3 | 47 | 75 | 62        | 30        | 122         | 15000            | 25, 35, 24, 28, 28, 33, 24, 20, 25, 24, 29, 31, 29, 25, 21, 15, 16, 22, 25, 31, 32, 19, 22, 29, 29, 28, 34, 18, 21, 17, 26, 24, 27, 35, 17, 28, 23, 33, 15, 22, 32, 21, 26, 29, 16, 26, 30, 33, 27, 21, 19, 26, 18, 17, 23, 19, 24, 26, 18, 18, 19, 33 |

|    |          |   |    |    |    |    |     |        |                                                                                                                                                                                                                                                                    |
|----|----------|---|----|----|----|----|-----|--------|--------------------------------------------------------------------------------------------------------------------------------------------------------------------------------------------------------------------------------------------------------------------|
| 43 | (62,2,1) | 3 | 47 | 75 | 62 | 30 | 154 | 18750  | 33, 32, 25, 16, 27, 19, 33, 25, 18, 24, 22, 32, 25, 21, 29, 23, 32, 22, 20, 31, 33, 18, 29, 32, 29, 22, 21, 23, 30, 30, 23, 25, 22, 31, 27, 22, 24, 27, 22, 35, 29, 16, 33, 24, 33, 25, 15, 23, 22, 22, 26, 17, 29, 21, 15, 25, 31, 20, 25, 28, 35, 25             |
| 44 | (62,2,1) | 3 | 47 | 75 | 62 | 30 | 88  | 10500  | 20, 15, 26, 17, 19, 34, 28, 22, 24, 31, 28, 32, 22, 17, 25, 32, 15, 35, 15, 31, 34, 25, 24, 21, 28, 16, 30, 35, 32, 30, 32, 26, 30, 27, 23, 16, 25, 21, 16, 35, 34, 32, 20, 27, 29, 16, 29, 34, 17, 30, 25, 30, 27, 18, 28, 32, 29, 22, 18, 31, 29, 18             |
| 45 | (62,2,1) | 3 | 47 | 75 | 62 | 70 | 295 | 85750  | 28, 20, 19, 18, 18, 28, 23, 19, 17, 18, 21, 20, 19, 34, 20, 20, 31, 35, 31, 24, 27, 24, 31, 31, 20, 23, 31, 19, 33, 30, 29, 26, 25, 23, 32, 31, 25, 35, 23, 27, 18, 28, 19, 22, 25, 15, 15, 24, 33, 31, 23, 21, 25, 22, 19, 17, 27, 23, 33, 20, 23, 31             |
| 46 | (62,2,1) | 3 | 47 | 75 | 62 | 70 | 193 | 56000  | 15, 25, 20, 27, 30, 35, 31, 16, 23, 17, 35, 21, 29, 30, 28, 20, 26, 27, 26, 24, 28, 22, 18, 21, 19, 16, 18, 32, 35, 22, 25, 27, 34, 32, 29, 26, 26, 29, 17, 27, 22, 15, 27, 25, 21, 15, 29, 34, 28, 18, 30, 33, 23, 19, 32, 32, 33, 25, 27, 30, 18, 23             |
| 47 | (62,2,1) | 3 | 47 | 75 | 62 | 30 | 63  | 7500   | 22, 30, 34, 28, 29, 29, 26, 34, 15, 25, 20, 21, 26, 26, 23, 29, 21, 27, 21, 24, 29, 21, 33, 23, 18, 31, 27, 16, 15, 21, 21, 15, 29, 28, 17, 20, 26, 23, 24, 19, 27, 32, 35, 20, 17, 27, 35, 24, 23, 19, 29, 33, 21, 16, 24, 17, 31, 19, 21, 32, 33, 24             |
| 48 | (62,2,1) | 3 | 47 | 75 | 62 | 30 | 118 | 14250  | 17, 34, 35, 29, 21, 15, 34, 31, 29, 33, 34, 30, 22, 22, 31, 17, 16, 19, 16, 24, 22, 20, 19, 34, 18, 17, 27, 29, 17, 21, 31, 15, 24, 24, 34, 22, 27, 17, 18, 32, 32, 27, 21, 23, 34, 26, 28, 35, 18, 27, 28, 24, 32, 20, 15, 24, 29, 20, 28, 21, 35, 16             |
| 49 | (62,2,1) | 3 | 47 | 75 | 62 | 30 | 150 | 18750  | 25, 18, 15, 17, 20, 30, 30, 28, 35, 32, 27, 31, 32, 18, 26, 25, 32, 19, 33, 16, 23, 19, 35, 23, 17, 31, 15, 33, 18, 34, 27, 16, 32, 20, 23, 16, 15, 32, 32, 32, 29, 22, 21, 18, 30, 26, 34, 24, 34, 27, 27, 16, 31, 17, 28, 30, 35, 22, 22, 32, 30, 29             |
| 50 | (62,2,1) | 3 | 47 | 75 | 62 | 70 | 276 | 80500  | 33, 23, 29, 18, 32, 25, 17, 25, 28, 19, 33, 32, 29, 34, 21, 34, 28, 33, 20, 16, 16, 17, 21, 33, 17, 25, 24, 25, 19, 34, 24, 17, 27, 16, 19, 32, 15, 18, 18, 24, 34, 18, 28, 21, 26, 17, 19, 35, 29, 15, 34, 28, 29, 22, 20, 16, 34, 15, 15, 21, 24, 21             |
| 51 | (65,2,1) | 3 | 47 | 75 | 65 | 30 | 96  | 12000  | 19, 31, 32, 33, 22, 34, 26, 26, 19, 26, 30, 29, 22, 31, 25, 15, 16, 17, 16, 15, 15, 16, 32, 24, 30, 21, 34, 20, 17, 23, 25, 28, 26, 16, 33, 33, 24, 18, 26, 15, 16, 22, 16, 33, 25, 24, 15, 33, 20, 27, 18, 32, 22, 32, 17, 30, 23, 19, 35, 24, 23, 23, 30, 18, 33 |
| 52 | (65,2,1) | 3 | 47 | 75 | 65 | 70 | 600 | 175000 | 28, 22, 26, 28, 18, 27, 26, 19, 20, 22, 26, 24, 30, 26, 25,                                                                                                                                                                                                        |

|    |          |   |    |    |        |        |         |             |                                                                                                                                                                                                                                                                    |
|----|----------|---|----|----|--------|--------|---------|-------------|--------------------------------------------------------------------------------------------------------------------------------------------------------------------------------------------------------------------------------------------------------------------|
|    |          |   |    |    |        |        |         |             | 31, 29, 18, 15, 23, 25, 16, 26, 33, 22, 30, 26, 30, 18, 31, 21, 24, 20, 17, 27, 19, 16, 23, 22, 23, 18, 18, 16, 18, 35, 19, 24, 32, 32, 25, 15, 24, 29, 17, 19, 24, 33, 34, 35, 25, 33, 26, 27, 15, 16                                                             |
| 53 | (65,2,1) | 3 | 47 | 75 | 65     | 30     | 147     | 18000       | 29, 35, 33, 15, 15, 32, 34, 25, 21, 32, 22, 19, 18, 21, 17, 26, 30, 32, 21, 17, 15, 15, 32, 21, 27, 32, 26, 26, 18, 26, 17, 34, 35, 17, 21, 34, 15, 28, 17, 30, 34, 35, 28, 32, 25, 35, 24, 18, 32, 23, 19, 16, 35, 15, 33, 18, 22, 15, 27, 18, 22, 29, 15, 33, 19 |
| 54 | (65,2,1) | 3 | 47 | 75 | 65     | 70     | 462     | 134750      | 30, 34, 27, 31, 33, 25, 20, 18, 21, 29, 18, 28, 27, 16, 17, 21, 30, 33, 20, 24, 25, 15, 26, 21, 18, 33, 25, 22, 19, 34, 34, 30, 30, 18, 35, 28, 28, 25, 33, 30, 16, 31, 27, 17, 15, 30, 33, 17, 23, 34, 16, 28, 29, 21, 35, 25, 24, 31, 20, 19, 32, 32, 33, 29, 15 |
| 55 | (65,2,1) | 3 | 47 | 75 | 65     | 30     | 76      | 9000        | 18, 25, 34, 19, 30, 18, 20, 32, 30, 26, 35, 23, 27, 32, 30, 16, 30, 34, 19, 32, 35, 35, 20, 30, 23, 35, 17, 19, 20, 29, 22, 18, 32, 19, 29, 34, 20, 30, 29, 16, 32, 27, 27, 31, 26, 25, 33, 16, 35, 32, 21, 33, 35, 19, 16, 19, 35, 25, 33, 20, 21, 21, 21, 18, 19 |
| 56 | (65,2,1) | 3 | 47 | 75 | 65     | 70     | 324     | 94500       | 19, 24, 28, 35, 27, 24, 27, 17, 31, 15, 31, 31, 15, 27, 30, 32, 22, 27, 18, 26, 17, 35, 26, 18, 15, 15, 17, 28, 20, 25, 18, 15, 26, 27, 23, 28, 20, 34, 16, 24, 35, 23, 18, 17, 15, 20, 21, 15, 27, 30, 17, 25, 21, 17, 30, 33, 24, 19, 33, 21, 30, 24, 17, 15, 22 |
| 57 | (65,2,1) | 3 | 47 | 75 | 65     | 30     | 127     | 15750       | 21, 16, 22, 30, 24, 17, 35, 31, 32, 32, 27, 26, 24, 23, 22, 27, 22, 28, 16, 33, 27, 34, 20, 18, 20, 17, 17, 25, 21, 33, 35, 32, 20, 28, 17, 35, 33, 18, 32, 31, 30, 19, 17, 31, 26, 16, 21, 21, 18, 28, 35, 16, 27, 24, 32, 27, 26, 35, 26, 35, 19, 27, 27, 33, 18 |
| 58 | (65,2,1) | 3 | 47 | 75 | 65     | 70     | 185     | 52500       | 30, 15, 29, 17, 29, 23, 35, 24, 19, 29, 23, 21, 32, 26, 22, 22, 22, 21, 15, 28, 17, 33, 35, 27, 33, 18, 30, 21, 22, 28, 31, 20, 15, 29, 32, 29, 33, 23, 28, 31, 33, 15, 17, 16, 16, 32, 29, 20, 18, 26, 18, 29, 34, 22, 34, 21, 15, 29, 18, 15, 16, 29, 23, 30, 22 |
| 59 | (65,2,1) | 3 | 47 | 75 | 65     | 30     | 178     | 21750       | 31, 27, 24, 33, 26, 15, 21, 30, 20, 26, 19, 29, 20, 21, 35, 17, 35, 23, 35, 35, 27, 33, 21, 35, 16, 20, 30, 18, 22, 23, 19, 17, 30, 29, 18, 23, 25, 20, 23, 18, 28, 32, 29, 30, 34, 35, 30, 19, 30, 16, 15, 21, 19, 20, 27, 28, 25, 31, 31, 16, 26, 32, 33, 27, 25 |
| 60 | (65,2,1) | 3 | 47 | 75 | 65     | 70     | 468     | 136500      | 19, 26, 31, 20, 23, 29, 29, 23, 21, 15, 15, 24, 29, 16, 27, 33, 35, 24, 33, 29, 29, 24, 35, 15, 29, 21, 30, 27, 23, 31, 15, 26, 24, 30, 33, 30, 25, 25, 19, 25, 31, 28, 28, 15, 24, 30, 17, 26, 22, 35, 20, 33, 26, 26, 29, 22, 15, 26, 24, 17, 15, 35, 29, 23, 21 |
| 61 | (73,3,2) | 3 | 47 | 75 | 35, 38 | 30, 30 | 60, 137 | 7500, 16500 | 29, 33, 32, 19, 16, 32, 27, 20, 15, 17, 32, 16, 19, 24, 29, 24, 34, 31, 21, 24, 24, 27, 32, 22, 26, 31, 27, 24, 17, 30,                                                                                                                                            |

|    |          |   |    |    |        |        |          |               |                                                                                                                                                                                                                                                                                                    |
|----|----------|---|----|----|--------|--------|----------|---------------|----------------------------------------------------------------------------------------------------------------------------------------------------------------------------------------------------------------------------------------------------------------------------------------------------|
|    |          |   |    |    |        |        |          |               | 35, 33, 26, 24, 27, 29, 35, 25, 18, 25, 34, 33, 16, 25, 32, 24, 31, 16, 17, 20, 24, 31, 25, 16, 18, 20, 25, 31, 31, 22, 26, 32, 34, 32, 17, 30, 16, 29, 34, 23, 32, 20, 35                                                                                                                         |
| 62 | (73,3,2) | 3 | 47 | 75 | 27, 46 | 30, 70 | 158, 515 | 19500, 148750 | 30, 29, 28, 27, 25, 27, 19, 15, 28, 18, 18, 23, 29, 23, 15, 32, 26, 32, 21, 20, 24, 35, 28, 32, 21, 31, 21, 30, 30, 35, 22, 19, 29, 20, 19, 35, 24, 20, 26, 24, 26, 31, 34, 16, 26, 22, 24, 30, 27, 35, 16, 32, 34, 19, 35, 17, 29, 19, 22, 19, 25, 23, 31, 29, 20, 35, 30, 23, 22, 34, 19, 20, 15 |
| 63 | (73,3,2) | 3 | 47 | 75 | 37, 36 | 30, 70 | 159, 370 | 19500, 106750 | 31, 26, 24, 22, 34, 23, 20, 31, 28, 19, 17, 18, 18, 23, 29, 33, 31, 34, 21, 29, 25, 30, 24, 28, 15, 19, 35, 24, 30, 19, 18, 19, 24, 16, 18, 28, 35, 15, 27, 23, 17, 30, 18, 29, 32, 28, 26, 24, 16, 30, 30, 33, 23, 22, 24, 27, 24, 16, 26, 23, 32, 27, 19, 25, 16, 32, 23, 18, 31, 24, 35, 20, 16 |
| 64 | (73,3,2) | 3 | 47 | 75 | 36, 37 | 70, 30 | 404, 111 | 117250, 13500 | 31, 15, 20, 31, 34, 18, 33, 26, 28, 33, 15, 25, 21, 22, 23, 21, 22, 35, 34, 26, 26, 25, 33, 16, 30, 19, 29, 18, 21, 24, 34, 27, 27, 33, 17, 34, 25, 31, 35, 30, 16, 20, 35, 21, 18, 27, 27, 31, 18, 32, 22, 35, 33, 25, 20, 24, 28, 33, 17, 20, 18, 18, 16, 22, 19, 17, 16, 33, 19, 22, 30, 28, 25 |
| 65 | (73,3,2) | 3 | 47 | 75 | 39, 34 | 70, 30 | 552, 95  | 161000, 11250 | 19, 33, 16, 26, 22, 21, 33, 21, 28, 34, 35, 19, 31, 22, 30, 29, 35, 16, 34, 22, 26, 33, 29, 34, 24, 20, 23, 25, 21, 20, 30, 34, 22, 29, 30, 27, 35, 26, 15, 29, 29, 18, 19, 33, 24, 25, 21, 25, 29, 26, 35, 28, 30, 27, 30, 21, 24, 21, 29, 17, 17, 30, 33, 18, 23, 35, 30, 27, 15, 34, 17, 28, 26 |
| 66 | (73,3,2) | 3 | 47 | 75 | 34, 39 | 30, 70 | 91, 425  | 11250, 122500 | 20, 29, 33, 21, 31, 16, 25, 16, 20, 27, 34, 27, 21, 21, 24, 30, 19, 17, 34, 19, 27, 29, 25, 22, 19, 21, 17, 19, 34, 25, 25, 21, 25, 25, 29, 33, 25, 21, 23, 28, 20, 16, 15, 25, 31, 31, 23, 19, 18, 21, 15, 29, 19, 30, 26, 17, 27, 18, 20, 22, 24, 35, 30, 35, 26, 20, 23, 22, 24, 24, 33, 28, 27 |
| 67 | (73,3,2) | 3 | 47 | 75 | 34, 39 | 30, 70 | 91, 280  | 11250, 80500  | 21, 18, 29, 29, 18, 32, 25, 32, 20, 28, 33, 21, 31, 21, 17, 18, 32, 19, 26, 28, 28, 24, 21, 18, 34, 21, 32, 26, 34, 30, 33, 28, 20, 21, 28, 26, 15, 16, 23, 35, 33, 35, 33, 17, 16, 29, 24, 34, 28, 15, 28, 30, 28, 20, 15, 35, 31, 27, 32, 18, 32, 26, 26, 19, 22, 17, 16, 16, 33, 35, 20, 15, 28 |
| 68 | (73,3,2) | 3 | 47 | 75 | 39, 34 | 30, 30 | 68, 69   | 8250, 8250    | 29, 15, 25, 24, 27, 27, 17, 27, 20, 29, 31, 28, 33, 20, 24, 26, 16, 20, 26, 25, 28, 32, 30, 28, 15, 22, 18, 19, 26, 35, 29, 28, 15, 30, 20, 33, 26, 32, 32, 34, 24, 33, 17, 29, 23, 27, 18, 28, 30, 30, 20, 31, 17, 22, 32, 32, 27, 23, 23, 15, 31, 17, 23, 15, 25, 23, 30, 31, 21, 25, 15, 15, 29 |
| 69 | (73,3,2) | 3 | 47 | 75 | 36, 37 | 70, 30 | 374, 174 | 108500, 21750 | 30, 33, 21, 19, 15, 23, 30, 22, 33, 22, 30, 23, 23, 19, 18, 27, 28, 22, 25, 21, 29, 27, 26, 24, 30, 23, 33, 26, 18, 19, 24, 35, 18, 26, 19, 26, 15, 27, 32, 33, 24, 31, 34, 21, 29, 33, 20, 34, 19, 25, 34, 24, 27, 25, 21, 29, 30, 33, 34, 33, 17, 21, 19, 33, 29, 20, 22, 26, 30, 15, 23, 15, 30 |
| 70 | (73,3,2) | 3 | 47 | 75 | 38, 35 | 30, 30 | 167, 158 | 20250, 19500  | 31, 30, 17, 27, 23, 18, 30, 17, 34, 23, 29, 30, 33, 19, 32, 35, 33, 31, 17, 17, 29, 35, 22, 33, 25, 31, 27, 20, 18, 16, 20, 22, 34, 22, 18, 32, 26, 22, 33, 31, 15, 21, 18, 34, 23,                                                                                                                |

|    |          |   |    |    |        |        |          |               |                                                                                                                                                                                                                                                                                                                                    |
|----|----------|---|----|----|--------|--------|----------|---------------|------------------------------------------------------------------------------------------------------------------------------------------------------------------------------------------------------------------------------------------------------------------------------------------------------------------------------------|
|    |          |   |    |    |        |        |          |               | 31, 21, 28, 29, 27, 26, 25, 16, 28, 17, 18, 34, 29, 17, 17, 16, 34, 15, 29, 24, 26, 15, 20, 18, 26, 18, 23, 18                                                                                                                                                                                                                     |
| 71 | (81,3,2) | 3 | 47 | 75 | 38, 43 | 30, 30 | 153, 92  | 18750, 11250  | 34, 24, 27, 16, 23, 18, 18, 23, 25, 33, 17, 27, 30, 31, 17, 30, 19, 32, 21, 35, 31, 21, 15, 30, 16, 18, 31, 25, 16, 17, 20, 17, 27, 19, 15, 25, 29, 30, 15, 22, 32, 21, 26, 26, 26, 30, 27, 15, 30, 17, 29, 34, 23, 17, 33, 25, 28, 23, 29, 35, 27, 17, 34, 23, 19, 29, 30, 25, 21, 20, 22, 23, 30, 30, 31, 27, 26, 32, 30, 33, 30 |
| 72 | (81,3,2) | 3 | 47 | 75 | 41, 40 | 30, 30 | 128, 145 | 15750, 18000  | 34, 17, 34, 32, 33, 18, 33, 24, 30, 34, 17, 23, 31, 26, 26, 18, 34, 33, 35, 21, 31, 26, 31, 29, 32, 35, 30, 31, 26, 33, 21, 16, 19, 17, 32, 17, 15, 15, 17, 16, 21, 16, 19, 27, 22, 33, 23, 33, 34, 35, 20, 31, 30, 29, 21, 22, 31, 29, 22, 21, 15, 28, 22, 31, 20, 30, 24, 16, 23, 21, 22, 20, 26, 19, 26, 17, 18, 21, 28, 30, 28 |
| 73 | (81,3,2) | 3 | 47 | 75 | 41, 40 | 70, 70 | 492, 295 | 143500, 85750 | 26, 18, 33, 18, 35, 17, 27, 32, 22, 15, 30, 20, 31, 34, 22, 35, 28, 33, 29, 15, 23, 31, 19, 16, 35, 31, 29, 24, 16, 28, 29, 15, 31, 15, 16, 30, 21, 34, 18, 31, 31, 31, 32, 20, 32, 15, 33, 29, 16, 23, 32, 15, 29, 20, 18, 26, 35, 26, 15, 16, 24, 18, 17, 32, 21, 30, 25, 21, 25, 22, 22, 17, 30, 30, 29, 35, 23, 18, 26, 28, 17 |
| 74 | (81,3,2) | 3 | 47 | 75 | 36, 45 | 70, 30 | 283, 108 | 82250, 13500  | 26, 32, 32, 33, 25, 17, 33, 20, 26, 16, 30, 16, 32, 29, 18, 23, 31, 34, 23, 22, 15, 15, 35, 23, 30, 27, 20, 30, 27, 23, 30, 22, 31, 34, 33, 21, 28, 32, 20, 17, 33, 25, 24, 21, 21, 18, 29, 26, 33, 19, 23, 33, 16, 24, 35, 23, 30, 32, 21, 31, 33, 29, 25, 32, 22, 23, 27, 33, 27, 23, 34, 23, 33, 19, 24, 25, 15, 16, 24, 17, 15 |
| 75 | (81,3,2) | 3 | 47 | 75 | 39, 42 | 30, 70 | 175, 358 | 21750, 103250 | 26, 33, 30, 20, 35, 29, 27, 21, 18, 18, 30, 26, 33, 24, 35, 20, 25, 35, 17, 15, 15, 32, 31, 31, 33, 23, 20, 23, 16, 18, 17, 21, 22, 24, 30, 34, 34, 17, 35, 31, 22, 28, 25, 22, 31, 20, 18, 23, 16, 28, 35, 30, 23, 16, 32, 19, 34, 29, 35, 25, 21, 27, 20, 19, 23, 23, 29, 16, 28, 24, 34, 20, 29, 30, 27, 23, 21, 26, 23, 15, 33 |
| 76 | (81,3,2) | 3 | 47 | 75 | 48, 33 | 70, 30 | 287, 93  | 82250, 11250  | 18, 34, 29, 35, 25, 29, 21, 29, 23, 19, 21, 22, 33, 33, 31, 16, 19, 35, 32, 30, 27, 16, 26, 17, 28, 19, 19, 29, 27, 34, 18, 20, 35, 22, 35, 26, 20, 15, 15, 25, 33, 22, 17, 23, 20, 23, 35, 20, 19, 25, 26, 34, 22, 20, 28, 15, 16, 35, 28, 20, 30, 17, 28, 19, 24, 23, 23, 28, 30, 26, 34, 25, 33, 19, 22, 34, 26, 24, 34, 34, 22 |
| 77 | (81,3,2) | 3 | 47 | 75 | 47, 34 | 30, 30 | 125, 146 | 15000, 18000  | 18, 27, 28, 21, 27, 28, 27, 17, 15, 21, 21, 19, 34, 28, 19, 25, 34, 23, 18, 16, 27, 21, 21, 17, 31, 15, 31, 22, 17, 29, 26, 27, 26, 20, 31, 17, 26, 34, 17, 19, 22, 16, 30, 24, 30, 26, 23, 17, 15, 34, 30, 31, 29, 32, 25, 33, 33, 32, 21, 35, 18, 29, 23, 19, 33, 24, 24, 19, 32, 27, 26, 23, 16, 30, 25, 32, 18, 34, 32, 23, 20 |
| 78 | (81,3,2) | 3 | 47 | 75 | 50, 31 | 30, 70 | 100, 486 | 12000, 141750 | 19, 28, 26, 29, 16, 28, 21, 18, 20, 22, 21, 15, 35, 15, 15, 22, 29, 23, 33, 31, 19, 26, 30, 25, 25, 32, 31, 28, 28, 32,                                                                                                                                                                                                            |

|    |          |   |    |    |           |           |             |                   |                                                                                                                                                                                                                                                                                                                                        |
|----|----------|---|----|----|-----------|-----------|-------------|-------------------|----------------------------------------------------------------------------------------------------------------------------------------------------------------------------------------------------------------------------------------------------------------------------------------------------------------------------------------|
|    |          |   |    |    |           |           |             |                   | 26, 26, 18, 19, 15, 30, 20, 20, 31, 34, 24, 32, 23, 17, 18, 15, 20, 27, 19, 30, 21, 28, 28, 23, 21, 29, 15, 17, 35, 29, 27, 19, 18, 27, 34, 16, 26, 24, 34, 28, 26, 28, 33, 19, 20, 22, 23, 32, 30, 21, 17                                                                                                                             |
| 79 | (81,3,2) | 3 | 47 | 75 | 44,<br>37 | 70,<br>30 | 503,<br>109 | 145250<br>, 13500 | 19, 29, 25, 23, 27, 27, 15, 26, 32, 32, 34, 24, 35, 31, 32, 31, 23, 24, 27, 17, 19, 31, 25, 32, 28, 28, 30, 21, 17, 27, 35, 25, 30, 17, 33, 22, 26, 18, 33, 20, 34, 26, 15, 18, 28, 18, 29, 23, 35, 19, 33, 25, 35, 27, 18, 34, 18, 35, 27, 24, 15, 30, 26, 27, 35, 16, 28, 15, 15, 16, 25, 25, 15, 29, 23, 20, 29, 29, 29, 18, 28     |
| 80 | (81,3,2) | 3 | 47 | 75 | 41,<br>40 | 30,<br>70 | 172,<br>198 | 21000,<br>57750   | 32, 22, 24, 31, 16, 27, 21, 35, 16, 33, 34, 21, 15, 26, 28, 27, 17, 25, 21, 32, 32, 15, 21, 19, 23, 24, 29, 28, 28, 23, 35, 24, 29, 28, 29, 34, 33, 16, 35, 35, 23, 20, 15, 19, 25, 21, 26, 20, 18, 15, 24, 29, 21, 19, 35, 30, 22, 20, 20, 18, 24, 20, 21, 27, 15, 17, 22, 19, 30, 17, 25, 30, 19, 19, 18, 31, 21, 19, 27, 16, 25     |
| 81 | (82,3,2) | 3 | 47 | 75 | 45,<br>37 | 30,<br>70 | 81,<br>459  | 9750,<br>133000   | 23, 31, 25, 19, 26, 15, 35, 29, 35, 34, 17, 16, 35, 16, 16, 19, 25, 35, 25, 24, 33, 16, 26, 26, 20, 21, 21, 18, 18, 23, 31, 21, 26, 34, 26, 18, 22, 28, 28, 25, 23, 28, 20, 35, 23, 35, 17, 22, 24, 35, 26, 21, 23, 23, 27, 17, 17, 34, 33, 33, 31, 29, 35, 16, 17, 23, 31, 32, 18, 17, 28, 15, 29, 21, 29, 26, 16, 25, 27, 22, 28, 35 |
| 82 | (82,3,2) | 3 | 47 | 75 | 45,<br>37 | 30,<br>30 | 120,<br>155 | 15000,<br>18750   | 16, 29, 32, 29, 25, 30, 23, 34, 15, 26, 27, 16, 30, 33, 33, 34, 26, 29, 32, 24, 17, 32, 26, 21, 16, 20, 27, 28, 34, 23, 29, 33, 24, 30, 18, 25, 20, 30, 22, 15, 17, 21, 34, 24, 26, 32, 35, 17, 21, 26, 23, 28, 35, 20, 23, 21, 23, 27, 28, 21, 21, 24, 35, 17, 30, 25, 35, 33, 19, 17, 33, 19, 19, 16, 19, 31, 35, 15, 24, 33, 28, 19 |
| 83 | (82,3,2) | 3 | 47 | 75 | 48,<br>34 | 70,<br>30 | 584,<br>88  | 169750<br>, 10500 | 17, 28, 27, 18, 25, 16, 32, 26, 17, 25, 23, 17, 17, 29, 21, 29, 27, 23, 26, 16, 22, 28, 34, 24, 33, 19, 20, 18, 29, 32, 28, 25, 22, 35, 30, 31, 18, 32, 16, 25, 32, 34, 35, 33, 29, 20, 32, 21, 30, 17, 28, 35, 26, 16, 19, 24, 20, 20, 22, 30, 33, 19, 22, 26, 31, 19, 27, 35, 20, 17, 30, 15, 29, 19, 30, 24, 24, 34, 22, 30, 28, 32 |
| 84 | (82,3,2) | 3 | 47 | 75 | 46,<br>36 | 70,<br>30 | 589,<br>120 | 171500<br>, 15000 | 18, 27, 34, 29, 24, 30, 32, 30, 18, 25, 20, 18, 33, 25, 18, 23, 35, 17, 33, 16, 26, 15, 20, 19, 29, 32, 26, 29, 24, 32, 35, 16, 20, 32, 22, 17, 25, 25, 23, 27, 27, 26, 15, 22, 32, 17, 29, 25, 26, 21, 24, 34, 30, 34, 16, 28, 25, 34, 16, 26, 23, 27, 22, 27, 31, 21, 31, 16, 21, 30, 15, 19, 19, 35, 27, 29, 21, 33, 19, 28, 29, 17 |
| 85 | (82,3,2) | 3 | 47 | 75 | 47,<br>35 | 30,<br>30 | 93,<br>175  | 11250,<br>21750   | 32, 25, 20, 18, 24, 24, 20, 22, 20, 17, 16, 18, 28, 34, 27, 17, 15, 24, 27, 29, 31, 32, 28, 22, 25, 31, 19, 18, 19, 20, 34, 16, 18, 28, 34, 23, 23, 27, 17, 16, 21, 27, 17, 32, 34, 26, 25, 21, 35, 33, 21, 20, 22, 30, 20, 23, 23, 27, 32, 35, 34, 22, 22, 28, 31, 23, 22, 18, 22, 29, 33, 22, 29, 17, 17, 34, 19, 31, 30, 17, 29, 22 |

|    |          |   |    |    |           |           |             |                   |                                                                                                                                                                                                                                                                                                                                                                                            |
|----|----------|---|----|----|-----------|-----------|-------------|-------------------|--------------------------------------------------------------------------------------------------------------------------------------------------------------------------------------------------------------------------------------------------------------------------------------------------------------------------------------------------------------------------------------------|
| 86 | (82,3,2) | 3 | 47 | 75 | 47,<br>35 | 70,<br>70 | 248,<br>365 | 71750,<br>105000  | 33, 24, 15, 21, 23, 31, 29, 27, 21, 17, 25, 19, 16, 30, 23, 32, 16, 18, 21, 29, 28, 27, 27, 17, 21, 30, 25, 29, 35, 20, 33, 28, 29, 33, 26, 17, 21, 29, 32, 26, 15, 19, 31, 21, 16, 23, 35, 24, 32, 24, 26, 19, 26, 27, 17, 27, 28, 20, 26, 23, 32, 30, 30, 29, 24, 24, 26, 20, 31, 29, 17, 18, 18, 33, 15, 26, 29, 29, 28, 35, 29, 27                                                     |
| 87 | (82,3,2) | 3 | 47 | 75 | 44,<br>38 | 30,<br>30 | 148,<br>140 | 18000,<br>17250   | 35, 23, 22, 31, 23, 24, 29, 19, 23, 17, 22, 19, 32, 26, 33, 35, 16, 33, 28, 21, 33, 22, 35, 20, 17, 22, 18, 19, 30, 28, 32, 20, 27, 30, 18, 23, 27, 22, 25, 16, 18, 32, 32, 18, 19, 32, 32, 28, 28, 15, 23, 26, 17, 23, 34, 30, 26, 34, 20, 32, 22, 26, 30, 30, 24, 18, 17, 22, 33, 21, 35, 22, 29, 15, 26, 31, 27, 27, 25, 33, 29, 19                                                     |
| 88 | (82,3,2) | 3 | 47 | 75 | 35,<br>47 | 30,<br>30 | 164,<br>171 | 20250,<br>21000   | 28, 22, 16, 20, 22, 18, 17, 24, 32, 30, 18, 20, 27, 22, 29, 29, 17, 27, 21, 33, 17, 18, 21, 15, 34, 21, 24, 30, 25, 29, 18, 32, 25, 34, 30, 30, 25, 24, 19, 18, 33, 25, 33, 27, 21, 29, 29, 24, 16, 27, 20, 34, 29, 20, 30, 26, 31, 27, 15, 20, 33, 34, 30, 31, 24, 20, 22, 24, 34, 21, 33, 26, 18, 31, 24, 16, 24, 18, 23, 22, 29, 24                                                     |
| 89 | (82,3,2) | 3 | 47 | 75 | 41,<br>41 | 70,<br>30 | 403,<br>105 | 117250<br>, 12750 | 29, 20, 24, 31, 22, 25, 26, 15, 34, 30, 15, 21, 35, 31, 17, 23, 18, 21, 28, 33, 22, 26, 29, 18, 30, 20, 17, 19, 20, 16, 17, 23, 23, 31, 22, 15, 31, 26, 26, 28, 27, 17, 34, 16, 24, 17, 26, 27, 34, 18, 16, 33, 33, 16, 27, 29, 29, 19, 30, 29, 24, 29, 18, 19, 25, 22, 34, 25, 35, 21, 17, 22, 29, 26, 35, 29, 35, 16, 33, 20, 30, 29                                                     |
| 90 | (82,3,2) | 3 | 47 | 75 | 48,<br>34 | 30,<br>30 | 98,<br>137  | 12000,<br>16500   | 22, 27, 18, 33, 34, 19, 26, 20, 35, 29, 24, 21, 30, 27, 35, 17, 18, 15, 22, 25, 27, 22, 16, 34, 26, 32, 23, 30, 15, 17, 16, 23, 21, 27, 35, 22, 29, 19, 20, 17, 22, 17, 27, 26, 35, 35, 23, 31, 22, 30, 21, 19, 25, 25, 23, 33, 34, 25, 24, 17, 35, 24, 18, 20, 17, 23, 25, 19, 15, 21, 35, 25, 18, 29, 33, 34, 32, 35, 31, 17, 30, 35                                                     |
| 91 | (95,3,2) | 3 | 47 | 75 | 55,<br>40 | 70,<br>30 | 485,<br>117 | 140000<br>, 14250 | 23, 23, 33, 27, 29, 29, 25, 24, 17, 15, 16, 22, 32, 16, 20, 31, 25, 23, 35, 32, 32, 26, 28, 28, 21, 35, 19, 16, 31, 28, 15, 16, 31, 19, 27, 18, 34, 18, 26, 29, 22, 28, 15, 32, 18, 19, 26, 25, 32, 18, 21, 18, 17, 29, 21, 16, 33, 20, 29, 29, 24, 23, 26, 30, 33, 29, 35, 30, 27, 24, 20, 20, 22, 20, 35, 33, 27, 16, 15, 17, 34, 30, 18, 26, 18, 23, 35, 30, 27, 31, 33, 24, 20, 31, 25 |
| 92 | (95,3,2) | 3 | 47 | 75 | 52,<br>43 | 70,<br>30 | 453,<br>140 | 131250<br>, 17250 | 19, 19, 27, 28, 23, 23, 17, 29, 33, 23, 32, 18, 31, 23, 30, 26, 26, 22, 27, 31, 29, 18, 35, 34, 22, 29, 30, 18, 23, 29, 25, 19, 20, 16, 30, 28, 25, 15, 25, 20, 18, 24, 32, 16, 32, 26, 35, 15, 27, 26, 22, 18, 19, 20, 23, 17, 33, 17, 25, 18, 27, 21, 32, 19, 31, 18, 25, 30, 32, 22, 31, 20, 28, 31, 18, 34, 30, 20, 16, 25, 18, 25, 30, 35, 34, 17, 35, 29, 21, 35, 20, 28, 24, 17, 33 |
| 93 | (95,3,2) | 3 | 47 | 75 | 55,<br>40 | 70,<br>70 | 420,<br>347 | 122500<br>, 99750 | 15, 16, 21, 28, 17, 17, 17, 34, 29, 30, 35, 27, 22, 16, 20, 21, 34, 21, 18, 29, 33, 31, 20, 32, 16, 22, 19, 34, 15, 30,                                                                                                                                                                                                                                                                    |

|    |          |   |    |    |        |        |          |               |                                                                                                                                                                                                                                                                                                                                                                                            |
|----|----------|---|----|----|--------|--------|----------|---------------|--------------------------------------------------------------------------------------------------------------------------------------------------------------------------------------------------------------------------------------------------------------------------------------------------------------------------------------------------------------------------------------------|
|    |          |   |    |    |        |        |          |               | 35, 22, 16, 34, 34, 24, 15, 19, 32, 32, 15, 20, 35, 35, 25, 20, 23, 26, 35, 26, 23, 31, 21, 25, 25, 18, 33, 22, 29, 28, 22, 32, 16, 17, 30, 16, 22, 30, 16, 29, 34, 33, 26, 22, 22, 28, 34, 33, 18, 19, 23, 27, 21, 15, 29, 32, 15, 35, 28, 18, 35, 33, 20, 32, 33                                                                                                                         |
| 94 | (95,3,2) | 3 | 47 | 75 | 37, 58 | 30, 30 | 145, 63  | 18000, 7500   | 24, 25, 23, 29, 24, 23, 30, 17, 24, 17, 30, 23, 22, 22, 31, 16, 35, 20, 31, 27, 30, 22, 35, 30, 18, 29, 29, 28, 16, 23, 31, 25, 26, 23, 30, 33, 27, 16, 18, 16, 32, 17, 18, 19, 18, 15, 32, 16, 30, 26, 24, 32, 23, 16, 27, 27, 25, 20, 25, 18, 25, 30, 29, 35, 20, 34, 20, 31, 21, 28, 23, 25, 31, 33, 19, 29, 17, 17, 19, 27, 15, 22, 33, 24, 24, 26, 23, 33, 15, 22, 22, 30, 24, 18, 33 |
| 95 | (95,3,2) | 3 | 47 | 75 | 48, 47 | 30, 30 | 159, 62  | 19500, 7500   | 20, 21, 18, 29, 18, 17, 22, 22, 32, 17, 33, 19, 21, 28, 20, 32, 22, 26, 22, 25, 26, 35, 20, 15, 19, 23, 31, 22, 29, 24, 20, 27, 22, 20, 34, 30, 18, 34, 18, 28, 29, 34, 34, 17, 32, 30, 20, 28, 17, 34, 33, 32, 16, 20, 29, 28, 25, 25, 29, 28, 20, 19, 34, 24, 18, 32, 30, 31, 35, 35, 26, 24, 16, 24, 23, 22, 21, 22, 21, 34, 20, 24, 24, 24, 19, 20, 24, 19, 30, 26, 30, 35, 28, 33, 33 |
| 96 | (95,3,2) | 3 | 47 | 75 | 45, 50 | 30, 70 | 149, 352 | 18000, 101500 | 16, 30, 33, 30, 33, 24, 22, 27, 28, 24, 28, 15, 33, 21, 31, 35, 22, 25, 21, 15, 31, 27, 27, 34, 34, 17, 20, 17, 21, 25, 30, 30, 32, 17, 29, 18, 30, 18, 25, 32, 25, 31, 16, 22, 25, 24, 29, 26, 33, 34, 34, 32, 18, 32, 30, 29, 24, 22, 32, 18, 23, 17, 19, 22, 16, 22, 27, 31, 19, 34, 15, 16, 35, 27, 19, 23, 24, 35, 22, 21, 25, 19, 15, 33, 27, 35, 24, 17, 16, 30, 24, 31, 24, 19, 33 |
| 97 | (95,3,2) | 3 | 47 | 75 | 46, 49 | 30, 30 | 140, 107 | 17250, 12750  | 33, 27, 27, 31, 27, 18, 35, 24, 23, 32, 23, 32, 33, 27, 21, 30, 31, 24, 34, 34, 28, 18, 33, 32, 15, 32, 30, 32, 35, 26, 19, 33, 28, 34, 33, 35, 21, 35, 24, 23, 22, 35, 20, 20, 18, 19, 17, 16, 28, 21, 35, 25, 20, 15, 32, 30, 24, 27, 28, 28, 18, 28, 32, 19, 15, 19, 25, 18, 24, 20, 26, 16, 20, 18, 23, 24, 28, 18, 24, 29, 30, 34, 26, 34, 23, 29, 32, 23, 23, 34, 32, 15, 28, 34, 33 |
| 98 | (95,3,2) | 3 | 47 | 75 | 38, 57 | 30, 30 | 130, 106 | 15750, 12750  | 21, 15, 21, 18, 21, 33, 35, 29, 19, 18, 26, 28, 32, 20, 32, 25, 31, 31, 25, 32, 32, 31, 19, 18, 16, 26, 33, 34, 27, 19, 29, 35, 16, 31, 16, 23, 25, 32, 31, 35, 18, 32, 23, 25, 32, 34, 26, 27, 15, 21, 15, 25, 35, 28, 34, 31, 16, 25, 32, 18, 21, 26, 16, 30, 34, 17, 35, 19, 29, 19, 29, 29, 17, 29, 27, 18, 32, 23, 25, 15, 22, 16, 17, 22, 18, 23, 33, 21, 18, 17, 19, 33, 32, 20, 20 |
| 99 | (95,3,2) | 3 | 47 | 75 | 37, 58 | 70, 70 | 295, 358 | 85750, 103250 | 17, 32, 16, 19, 15, 19, 27, 34, 35, 26, 21, 24, 23, 26, 21, 20, 19, 30, 17, 30, 29, 23, 25, 16, 31, 33, 22, 29, 27, 20, 17, 17, 34, 28, 32, 20, 16, 16, 17, 19, 28, 28, 19, 23, 24, 28, 35, 17, 31, 21, 16, 25, 15, 32, 28, 33, 16, 30, 15, 28, 17, 16, 21, 27, 32, 15, 32, 19, 21, 18, 18, 29, 23, 20, 24, 19, 23, 15, 35, 23, 27, 31, 29, 23, 34, 17, 20, 20, 25, 21,                    |

|     |           |   |    |    |           |           |             |                  |                                                                                                                                                                                                                                                                                                                                                                                                                |
|-----|-----------|---|----|----|-----------|-----------|-------------|------------------|----------------------------------------------------------------------------------------------------------------------------------------------------------------------------------------------------------------------------------------------------------------------------------------------------------------------------------------------------------------------------------------------------------------|
|     |           |   |    |    |           |           |             |                  | 34, 17, 28, 27, 20                                                                                                                                                                                                                                                                                                                                                                                             |
| 100 | (95,3,2)  | 3 | 47 | 75 | 44,<br>51 | 70,<br>70 | 332,<br>383 | 96250,<br>110250 | 34, 21, 31, 20, 29, 34, 26, 18, 22, 25, 24, 20, 23, 19, 32, 15, 19, 29, 29, 28, 26, 27, 32, 35, 33, 26, 32, 23, 20, 21, 27, 20, 22, 25, 15, 29, 28, 34, 16, 31, 24, 24, 22, 28, 17, 22, 23, 29, 18, 29, 17, 26, 17, 23, 30, 34, 16, 27, 32, 17, 20, 35, 34, 17, 22, 25, 30, 19, 27, 25, 21, 20, 21, 31, 28, 33, 26, 20, 15, 30, 32, 26, 20, 32, 29, 32, 21, 26, 32, 25, 21, 35, 32, 21, 19                     |
| 101 | (100,3,2) | 3 | 47 | 75 | 49,<br>51 | 30,<br>30 | 165,<br>153 | 20250,<br>18750  | 19, 18, 23, 18, 33, 19, 16, 22, 25, 22, 31, 28, 28, 29, 26, 30, 19, 17, 20, 34, 20, 34, 17, 33, 22, 16, 30, 19, 22, 19, 25, 19, 31, 23, 35, 20, 21, 26, 26, 31, 17, 32, 19, 34, 29, 26, 18, 19, 27, 32, 22, 29, 33, 35, 28, 15, 25, 19, 35, 20, 23, 19, 19, 32, 24, 32, 33, 27, 22, 24, 34, 30, 25, 17, 17, 24, 28, 32, 33, 24, 26, 21, 24, 19, 29, 29, 18, 15, 28, 19, 31, 18, 29, 21, 28, 25, 16, 26, 33, 16 |
| 102 | (100,3,2) | 3 | 47 | 75 | 46,<br>54 | 30,<br>30 | 177,<br>154 | 21750,<br>18750  | 34, 31, 20, 34, 20, 22, 33, 34, 18, 32, 26, 28, 35, 20, 16, 27, 32, 24, 18, 28, 35, 23, 33, 25, 15, 34, 33, 28, 32, 35, 35, 31, 27, 31, 26, 17, 17, 29, 31, 24, 32, 20, 30, 22, 29, 27, 18, 34, 18, 33, 23, 28, 30, 18, 17, 18, 23, 24, 33, 19, 20, 17, 19, 16, 31, 34, 33, 24, 33, 28, 35, 34, 16, 18, 24, 29, 22, 23, 21, 32, 20, 30, 30, 34, 33, 24, 23, 19, 22, 19, 34, 21, 33, 15, 28, 15, 21, 26, 25, 20 |
| 103 | (100,3,2) | 3 | 47 | 75 | 50,<br>50 | 30,<br>70 | 91,<br>366  | 11250,<br>106750 | 28, 31, 24, 30, 27, 17, 29, 33, 24, 22, 22, 16, 34, 33, 35, 31, 23, 17, 16, 29, 29, 34, 35, 18, 16, 23, 15, 25, 28, 18, 31, 22, 32, 30, 17, 34, 22, 25, 29, 17, 26, 16, 20, 17, 16, 28, 19, 35, 31, 35, 24, 28, 35, 35, 28, 34, 34, 16, 22, 17, 31, 35, 20, 29, 30, 24, 25, 30, 24, 33, 29, 17, 21, 20, 32, 34, 17, 34, 22, 28, 35, 30, 29, 20, 16, 31, 20, 15, 29, 19, 17, 23, 28, 31, 21, 18, 26, 34, 16, 23 |
| 104 | (100,3,2) | 3 | 47 | 75 | 48,<br>52 | 30,<br>70 | 103,<br>326 | 12750,<br>94500  | 35, 23, 29, 25, 35, 19, 25, 33, 18, 33, 17, 16, 33, 24, 33, 28, 15, 24, 22, 31, 15, 23, 29, 18, 17, 33, 18, 34, 25, 22, 19, 33, 29, 16, 22, 31, 18, 28, 34, 31, 21, 25, 31, 33, 17, 29, 19, 16, 35, 16, 25, 28, 32, 18, 17, 16, 32, 21, 19, 15, 29, 24, 20, 34, 16, 26, 24, 28, 35, 29, 30, 20, 26, 21, 18, 26, 19, 25, 30, 23, 29, 31, 35, 27, 20, 18, 25, 19, 23, 27, 20, 25, 32, 25, 21, 28, 19, 22, 29, 26 |
| 105 | (100,3,2) | 3 | 47 | 75 | 47,<br>53 | 30,<br>70 | 114,<br>287 | 14250,<br>82250  | 29, 23, 34, 33, 34, 35, 21, 24, 24, 22, 33, 25, 19, 15, 31, 25, 28, 30, 21, 33, 30, 25, 24, 31, 18, 21, 20, 31, 22, 17, 16, 16, 26, 15, 34, 27, 35, 32, 31, 24, 15, 34, 21, 20, 17, 30, 32, 18, 26, 18, 26, 20, 30, 35, 28, 32, 22, 35, 17, 34, 26, 22, 20, 19, 15, 16, 16, 34, 26, 33, 31, 24, 18, 23, 26, 30, 35, 16, 31, 18, 23, 18, 33, 22, 24, 34, 21, 23, 30, 27, 15, 35, 28, 19, 34, 18, 24, 30, 20, 30 |
| 106 | (100,3,2) | 3 | 47 | 75 | 48,<br>52 | 30,<br>70 | 149,<br>317 | 18000,<br>91000  | 15, 15, 18, 29, 21, 17, 17, 23, 17, 33, 28, 25, 18, 15, 29, 29, 19, 16, 19, 26, 23, 35, 18, 24, 19, 31, 23, 19, 19, 21, 25, 28, 30, 22, 17, 24, 32, 27, 16, 30, 30, 22, 33, 15, 25,                                                                                                                                                                                                                            |

|     |           |   |    |    |        |        |          |              |                                                                                                                                                                                                                                                                                                                                                                                                                |
|-----|-----------|---|----|----|--------|--------|----------|--------------|----------------------------------------------------------------------------------------------------------------------------------------------------------------------------------------------------------------------------------------------------------------------------------------------------------------------------------------------------------------------------------------------------------------|
|     |           |   |    |    |        |        |          |              | 31, 33, 33, 30, 20, 27, 20, 35, 18, 17, 35, 19, 19, 27, 25, 24, 19, 20, 24, 35, 19, 16, 31, 16, 29, 24, 28, 23, 25, 33, 35, 16, 28, 19, 34, 17, 19, 19, 29, 28, 20, 26, 19, 16, 27, 19, 17, 31, 35, 27, 21, 30, 18, 33, 20                                                                                                                                                                                     |
| 107 | (100,3,2) | 3 | 47 | 75 | 52, 48 | 30, 30 | 161, 85  | 19500, 10500 | 29, 28, 15, 24, 28, 33, 34, 23, 23, 23, 23, 33, 17, 27, 20, 26, 32, 22, 25, 28, 17, 24, 33, 16, 34, 20, 26, 16, 16, 25, 21, 19, 27, 29, 29, 20, 28, 31, 34, 23, 25, 31, 31, 23, 25, 19, 33, 35, 21, 22, 28, 20, 32, 21, 27, 30, 30, 24, 25, 23, 34, 30, 20, 16, 21, 29, 29, 16, 28, 34, 25, 32, 27, 26, 20, 19, 32, 19, 20, 21, 32, 19, 17, 15, 32, 28, 23, 23, 31, 27, 22, 19, 27, 29, 27, 32, 35, 26, 25, 23 |
| 108 | (100,3,2) | 3 | 47 | 75 | 55, 45 | 30, 30 | 173, 109 | 21000, 13500 | 15, 28, 20, 20, 15, 15, 30, 35, 16, 34, 18, 34, 15, 19, 18, 31, 23, 29, 23, 30, 32, 26, 28, 29, 35, 30, 28, 25, 34, 21, 30, 31, 24, 28, 20, 30, 25, 34, 19, 15, 19, 19, 21, 18, 33, 20, 34, 15, 26, 16, 29, 32, 17, 17, 17, 33, 28, 16, 22, 21, 32, 27, 21, 21, 20, 32, 21, 35, 18, 17, 19, 35, 19, 28, 28, 32, 26, 23, 29, 16, 26, 27, 23, 30, 15, 23, 28, 27, 17, 27, 26, 29, 30, 23, 19, 21, 19, 34, 16, 27 |
| 109 | (100,3,2) | 3 | 47 | 75 | 51, 49 | 30, 30 | 87, 110  | 10500, 13500 | 30, 20, 25, 15, 15, 31, 26, 34, 22, 23, 34, 21, 22, 31, 16, 27, 15, 35, 21, 23, 18, 16, 30, 30, 15, 27, 31, 22, 22, 24, 27, 22, 29, 15, 25, 26, 29, 17, 16, 29, 34, 28, 32, 34, 33, 21, 26, 17, 17, 17, 17, 32, 35, 21, 27, 28, 18, 22, 33, 19, 30, 24, 21, 26, 27, 22, 20, 20, 30, 34, 20, 18, 24, 29, 35, 16, 29, 34, 30, 33, 20, 28, 21, 17, 19, 30, 25, 23, 32, 27, 29, 31, 26, 18, 20, 24, 25, 35, 29, 30 |
| 110 | (100,3,2) | 3 | 47 | 75 | 40, 60 | 30, 30 | 99, 112  | 12000, 13500 | 24, 20, 30, 31, 22, 34, 22, 34, 15, 34, 29, 22, 21, 23, 35, 24, 28, 21, 27, 25, 33, 26, 24, 22, 16, 15, 34, 31, 19, 20, 15, 34, 25, 22, 16, 23, 25, 33, 22, 22, 29, 16, 22, 21, 33, 22, 26, 32, 21, 19, 18, 32, 19, 25, 17, 31, 16, 27, 30, 17, 27, 35, 21, 31, 25, 24, 33, 17, 20, 17, 21, 22, 29, 31, 22, 21, 23, 25, 18, 28, 35, 28, 20, 24, 23, 17, 29, 27, 18, 34, 25, 33, 30, 33, 33, 35, 30, 22, 28, 33 |
